# Supplementary material for: A UiO-66 3D photonic crystal optical sensor for highly efficient chlorobenzene vapor detection
Source: Royal Society of Chemistry journal article supplement (doi:10.1039/d2ra05494a), 2022-01-01
Supplement: d2ra05494a1.pdf [file d2ra05494a1.pdf]

## Supplementary information

# UiO-66 3D Photonic Crystals Optical Sensor for Highly Efficient Chlorobenzene Vapor Detection

*Yaru Wang, Zhaolong Wang, Yangfan Gao, Yi Yuan, Jianfei Liu, Jun Yan, Yunlin Chen\**

School of Physical Science and Engineering, Beijing Jiaotong University, Beijing 100044, China

### Corresponding Author

\* E-mail address: ylchen@bjtu.edu.cn (Y. Chen).

## 1. General information

**Materials.** Zirconium tetrachloride ( $\text{ZrCl}_4$ ) was purchased from Shanghai Macklin Biochemical Co., Ltd. Terephthalic acid (BDC,  $\text{C}_8\text{H}_6\text{O}_4$ , AR,  $\geq 99.5\%$ ), 1,1,2-trichloroethane ( $\text{C}_2\text{H}_3\text{Cl}_3$ ), chlorobenzene ( $\text{C}_6\text{H}_5\text{Cl}$ ) and benzene ( $\text{C}_6\text{H}_6$ ) were obtained from Sinopharm Chemical Reagent Co., Ltd. N, N-dimethylformamide (DMF, AR,  $\geq 99.5\%$ ), acetic acid ( $\text{CH}_3\text{COOH}$ , AR,  $\geq 99.5\%$ ) and carbon tetrachloride ( $\text{CCl}_4$ , AR,  $\geq 99.5\%$ ) were acquired from Tian jin Fuyu Fine Chemical Co., Ltd. Polyvinylpyrrolidone (PVP,  $M_r=10,000$ ) was purchased from Sinopharm Chemical Reagent Co., Ltd (Shanghai, China). Methyl alcohol ( $\text{CH}_3\text{OH}$ , AR,  $\geq 99.5\%$ ), ethanol ( $\text{CH}_3\text{CH}_2\text{OH}$ , AR,  $\geq 99.5\%$ ) and dichloromethane ( $\text{CH}_2\text{Cl}_2$ , AR,  $\geq 99.5\%$ ) were got from Beijing Chemical Works.

**Characterization.** The surface and cross-section morphologies analysis of 3D PCs were investigated by Scanning Electron Microscope and Energy dispersive X-ray spectroscopy (SEM, EDS, JEM-6700 F). Powder X-ray diffraction (PXRD, Rigaku D/max,  $\lambda=1.5418 \text{ \AA}$ ) and Fourier transform infrared spectroscopy (FTIR, SPECTRUM 400) were used to research the performances of UiO-66 powders. The specific surface area was obtained from the  $\text{N}_2$  adsorption-desorption isotherms of the sample measured at 77 K using a JW-BK122W system.

## 2. Supplementary data

**Table S1.** Experimental parameters.

| Sample | ZrCl <sub>4</sub> (mg) | BDC (mg) | DMF (ml) | CH <sub>3</sub> COOH(M) | Reaction conditions |
|--------|------------------------|----------|----------|-------------------------|---------------------|
| 1      | 34.9                   | 24.9     | 10       | 0.5                     | 120°C 24h           |
| 2      | 34.9                   | 24.9     | 10       | 1.0                     | 120°C 24h           |
| 3      | 34.9                   | 24.9     | 10       | 1.5                     | 120°C 24h           |
| 4      | 34.9                   | 24.9     | 10       | 2.0                     | 120°C 24h           |

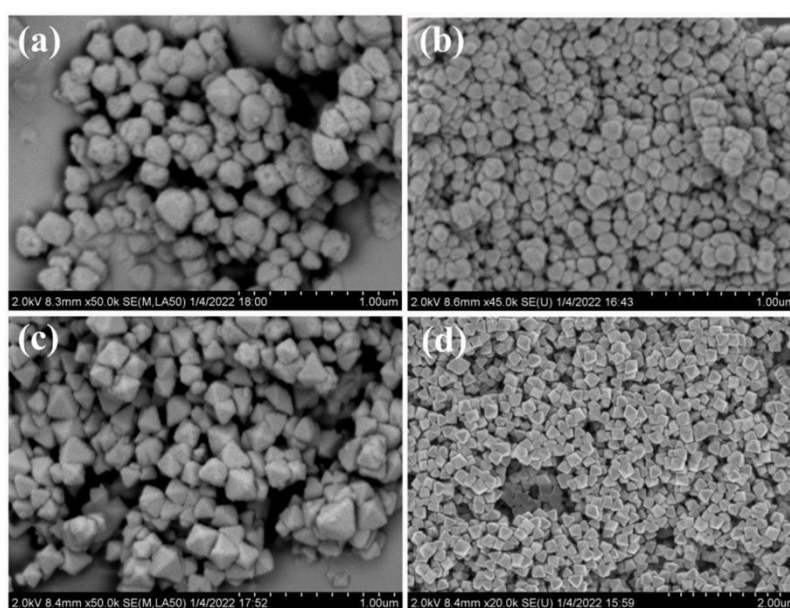

**Figure S1.** SEM images of UiO-66 nanoparticles synthesized in the presence of (a) 0.5 M acetic acid (sample 1), (b) 1.0 M acetic acid (sample 2), (c) 1.5 M acetic acid (sample 3), (d) 2.0 M acetic acid (sample 4).
